# Supplementary material
Source: bioRxiv or medRxiv preprint supplement (https://www.biorxiv.org/highwire/filestream/73188/field_highwire_adjunct_files/1/091512-10.pdf)

**Figure S10A**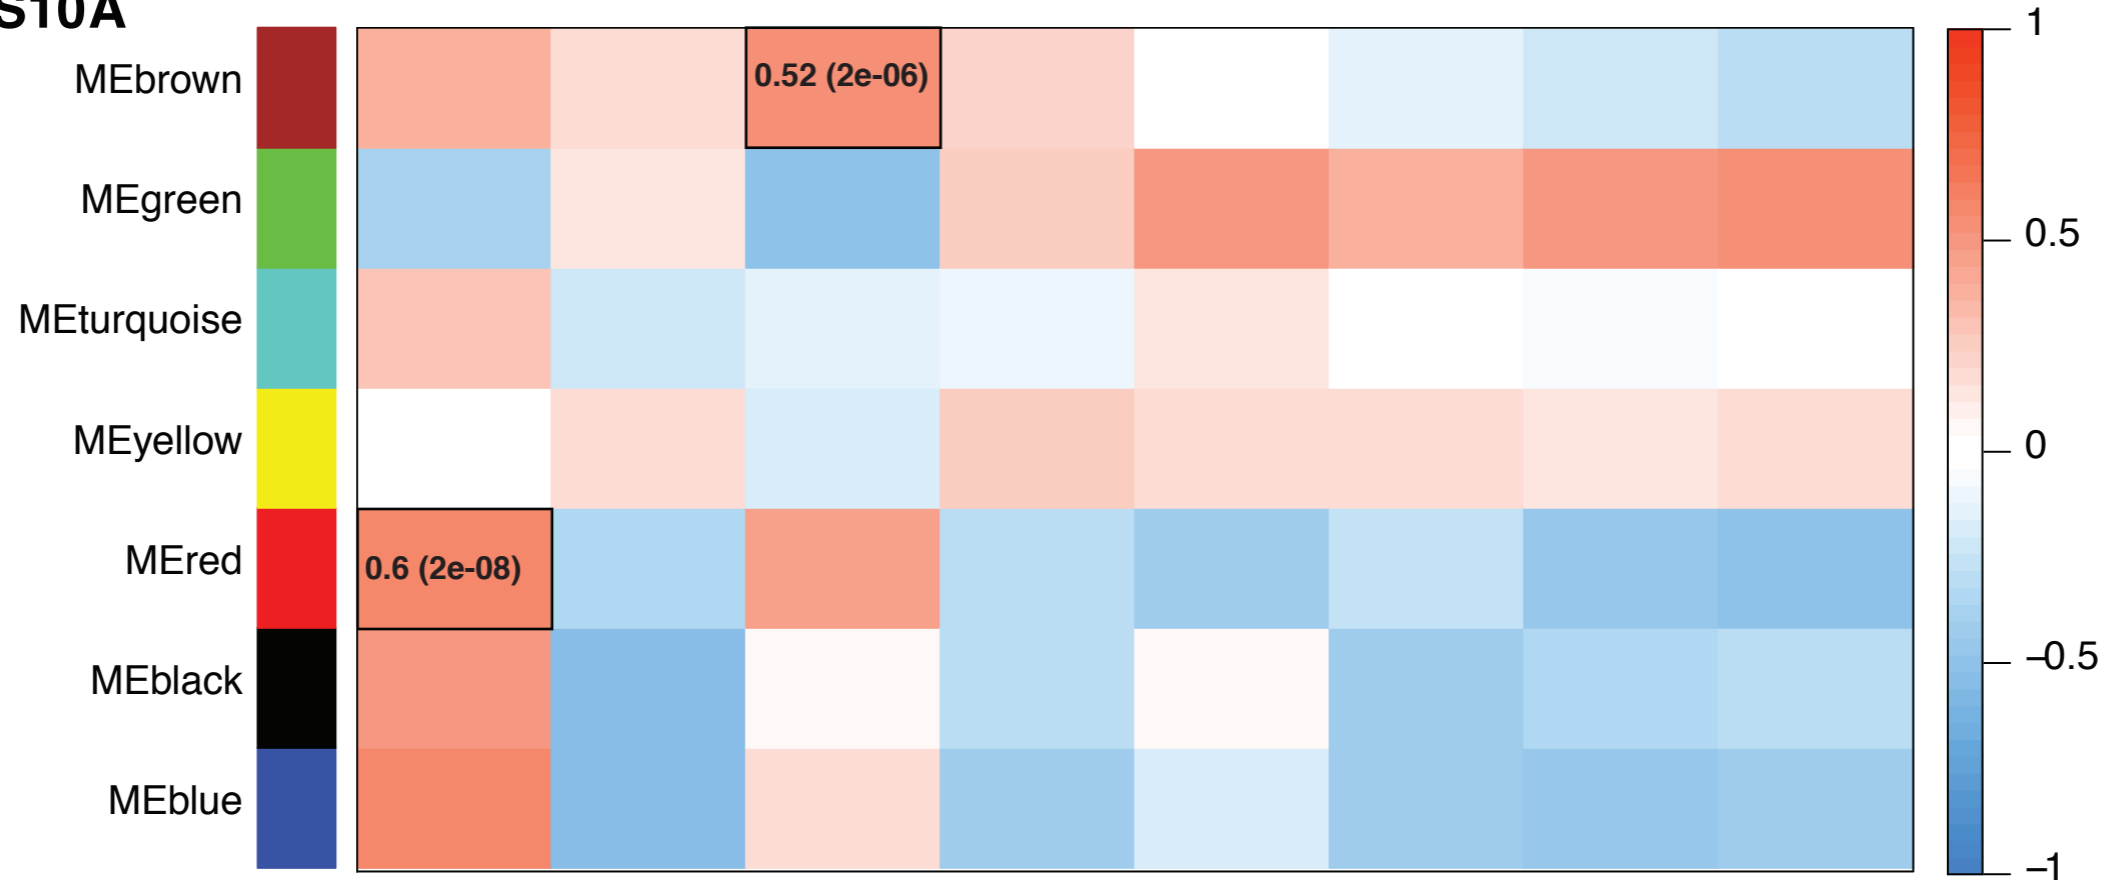**B****Module membership vs. population significance**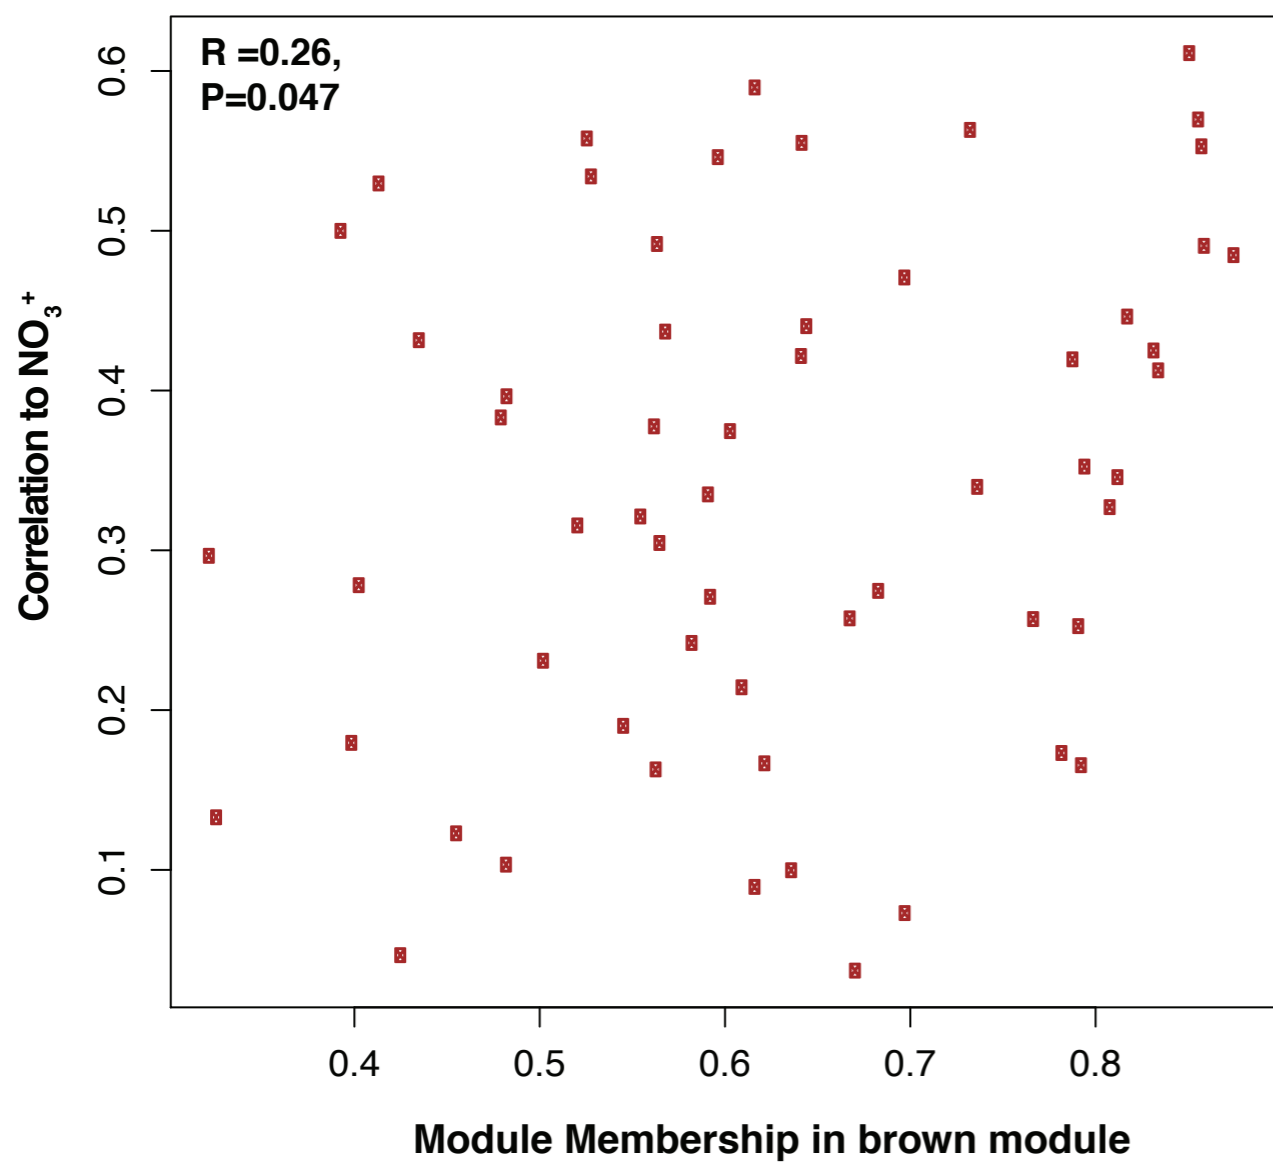**D****Module membership vs. population significance**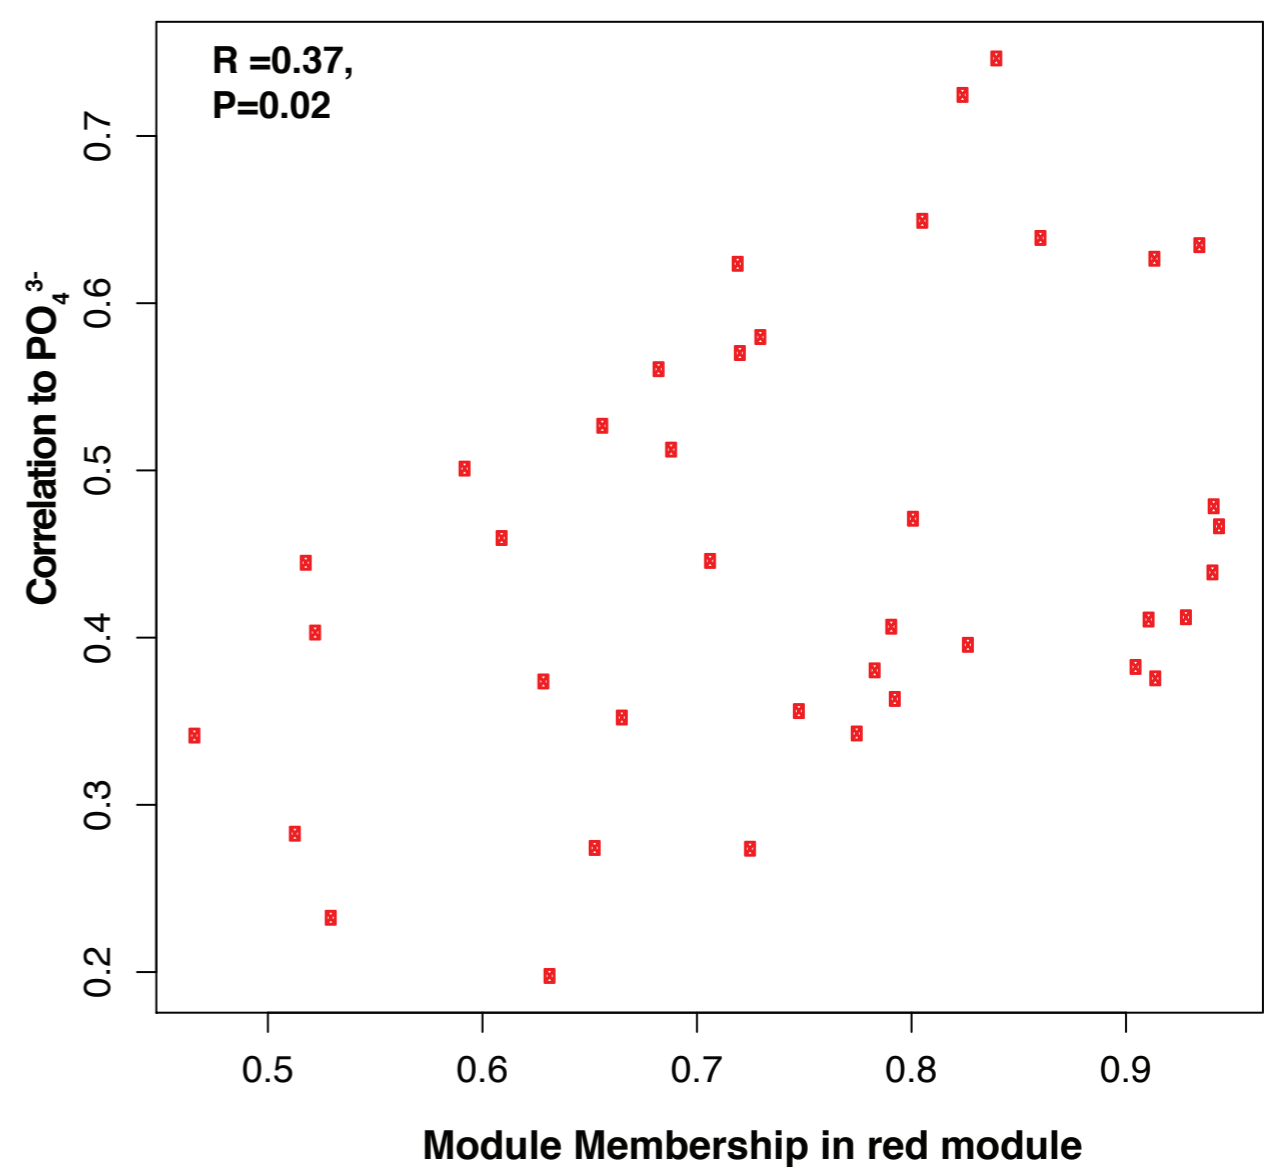**C****Comparison of  $\text{NO}_3^+$  measured vs predicted for module brown**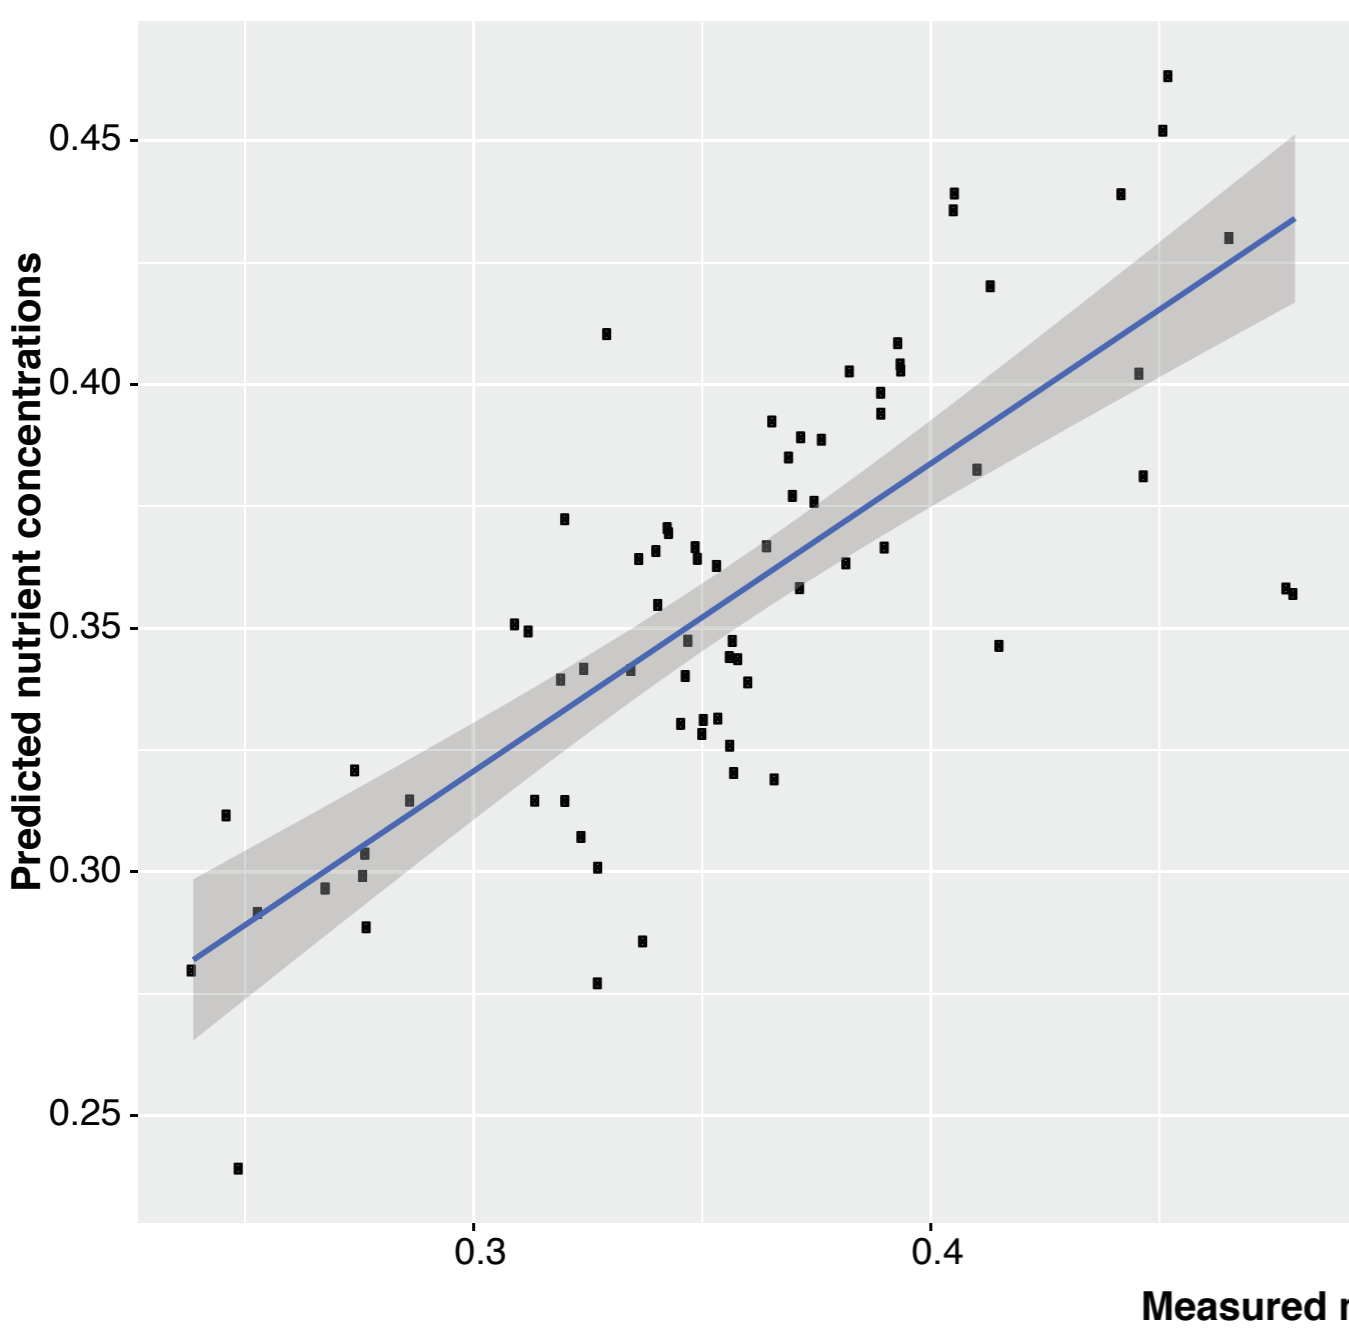**E****Comparison of  $\text{PO}_4^{3-}$  measured vs predicted for module red**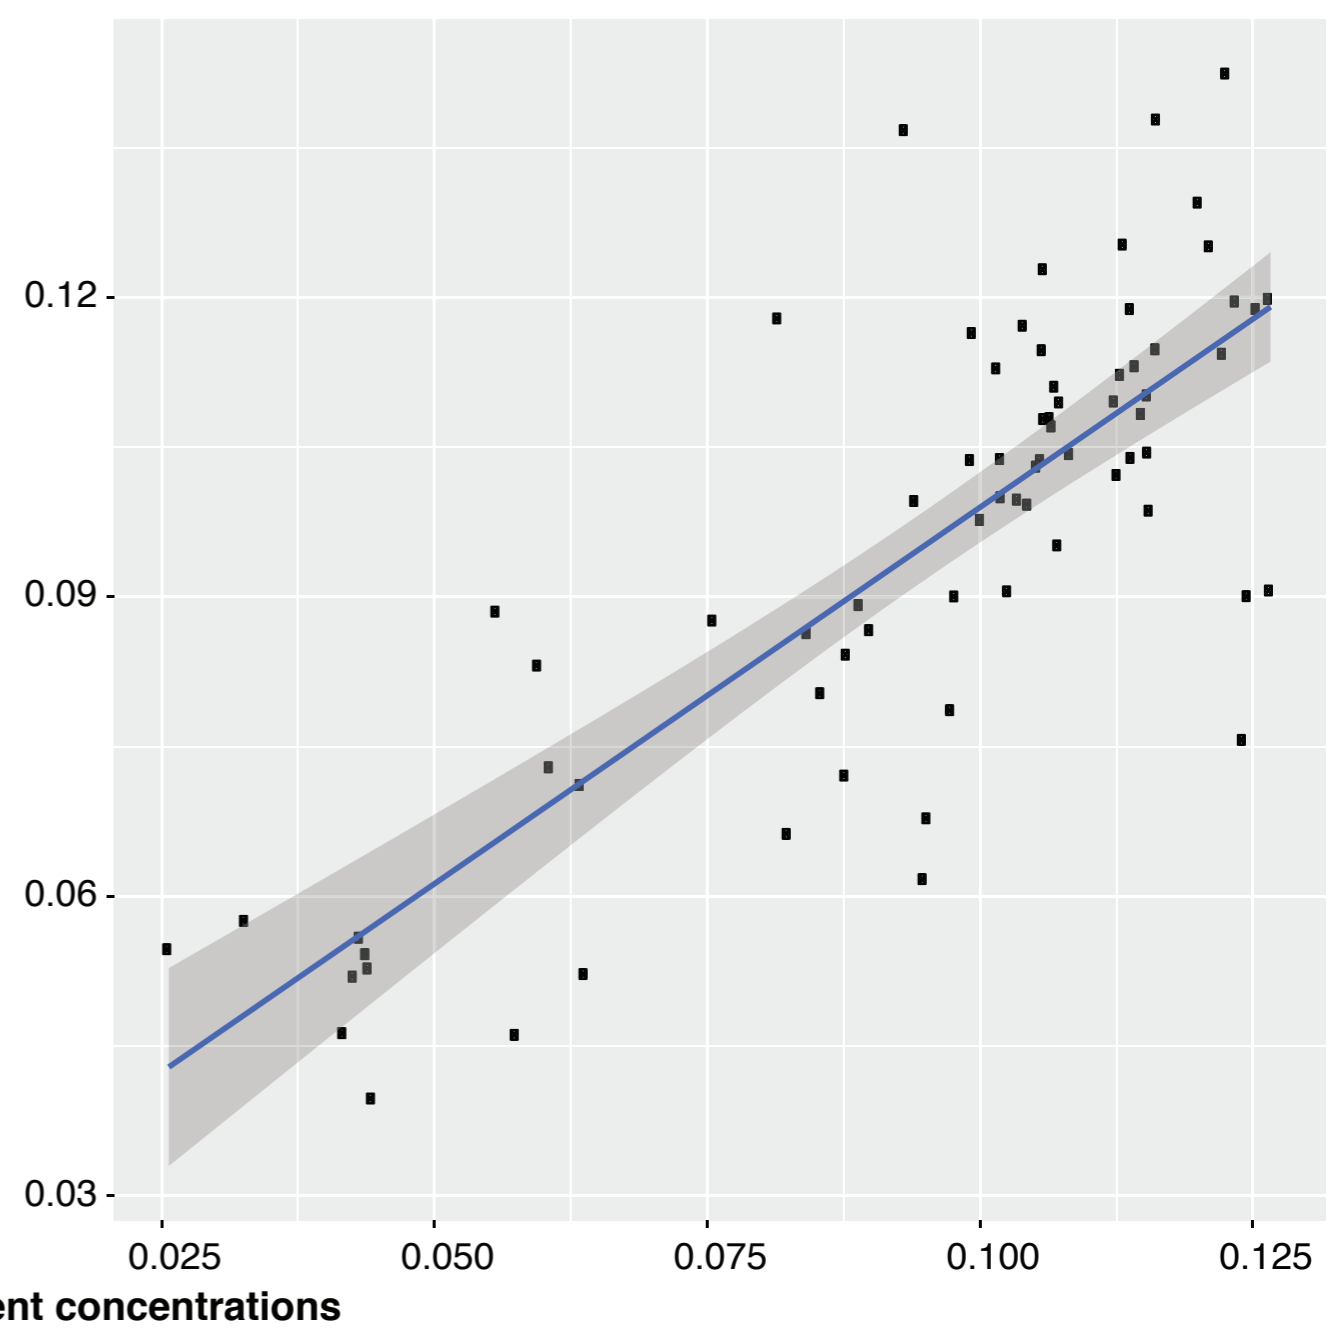

Supplement: Supplementary file [file 091512-10.pdf]
